# Supplementary material for: Single molecule magnet behavior and magnetic refrigeration of carbonyl oxygen-bridged tetranuclear lanthanide complexes
Source: Royal Society of Chemistry journal article supplement (doi:10.1039/d1nj01833g), 2021-01-01
Supplement: d1nj01833g1.pdf [file d1nj01833g1.pdf]

# Single-Molecule Magnet Behavior and Magnetic Refrigeration of Carbonyl Oxygen Bridged Tetranuclear Lanthanide Complexes

Chen Yang,<sup>a</sup> Yu-Heng Wei,<sup>a</sup> Shuang Xu,<sup>a</sup> Hao-Yu Zhang,<sup>a</sup> Yue-Qi Yang,<sup>a</sup> Bo Zhang,<sup>a</sup> Ming Fang,<sup>a,b \*</sup>

*a* Department of Chemistry, Hebei Normal University of Science & Technology, Qinhuangdao 066004, Hebei province, P. R.China. E-mail:fangmingchem@163.com

*c* Department of Chemistry, Key Laboratory of Advanced Energy Material Chemistry, MOE, and TKL of Metal and Molecule Based Material Chemistry, Nankai University, Tianjin 300071, China.. E-mail: zhaobin@nankai.edu.cn

## Electronic supplementary information

### Synthesis of Methyl 6-(Hydroxymethyl) Picolinate.

65 mmol NaBH<sub>4</sub> (2.46 g) was added in small portions over a period of 1 h to a stirred suspension of dimethyl pyridine-2,6-dicarboxylate (40 mmol, 7.81 g) in 200 mL MeOH at 0 °C. This mixture was stirred at room temperature for another 3 h and then MeOH was removed in a rotary evaporator (Scheme 1). A saturated NaHCO<sub>3</sub> aqueous solution (200 mL) was added to the residue and the resulting aqueous solution was extracted with CHCl<sub>3</sub> (5×100 mL). The combined organic layers were dried by anhydrous Na<sub>2</sub>SO<sub>4</sub>, filtered, and concentrated in vacuo to dryness. The resulting crude residue was purified by column chromatography (n-hexane/EtOAc; 1:1, then 1:2) giving the desired product as a white solid. Anal. Calcd (%) for C<sub>8</sub>H<sub>9</sub>NO<sub>3</sub>: C, 57.49; H, 5.39; N, 8.38. Found: C, 57.90; H, 5.26; N, 8.50.

---

*a* Department of Chemistry, Hebei Normal University of Science & Technology, Qinhuangdao 066004, Hebei province, P. R.China. E-mail: fangmingchem@163.com

*b* Key Laboratory of Advanced Energy Materials Chemistry (Ministry of Education), Nankai University, Tianjin 300071, China.

† Electronic Supporting Information Available: Crystallographic data in CIF format; tables of selected bond lengths and angles for compounds **1–3**, other magnetic data and plots. CCDC reference numbers 1862672-1862674 refer to compounds **1–3** respectively. This material is available free of charge via the Internet at See DOI: 10.1039/b000000x/.

### Synthesis of 6-(Hydroxymethyl) Picolinohydrazide

A methanolic solution of methyl 6-(hydroxymethyl) picolinate (10 mmol, 1.81 g) was added dropwise to a stirred solution of hydrazine hydrate (50 mmol) in 30 mL methanol at room temperature (Scheme 1). After the addition was over, the reaction mixture was heated under reflux for 3 h and subsequently allowed to come to room temperature before being kept in a refrigerator at 5 °C. A needle-shaped crystalline product was isolated which was suction-filtered, washed with a small amount of cold methanol, and air-dried. Anal. Calcd (%) for  $C_7H_9N_3O_2$ : C, 50.29; H, 5.43; N, 25.14. Found: C, 50.02; H, 5.16; N 24.86.

### Synthesis of N'-(2-hydroxy-5-methylbenzylidene)-6-(hydroxymethyl) picolinohydrazide (H<sub>2</sub>L)

A 10 mL methanolic solution of 2-hydroxy-5-methylbenzaldehyde (5 mmol, 0.68g) was added dropwise to a stirred suspension of 6-(hydroxymethyl) picolinohydrazide (5 mmol, 0.84g) in methanol (5 mL) at room temperature (Scheme 1). The reaction mixture was heated under reflux overnight, then cooled to room temperature and kept for 8 h without stirring. A precipitate formed was collected through filtration and washed with MeOH. Yield: 1.06 g (78.3%). Anal. Calcd (%) for  $C_{14}H_{13}N_3O_3$ : C, 61.99; H, 4.80; N, 15.50. Found: C, 61.82; H, 4.93; N, 15.68.

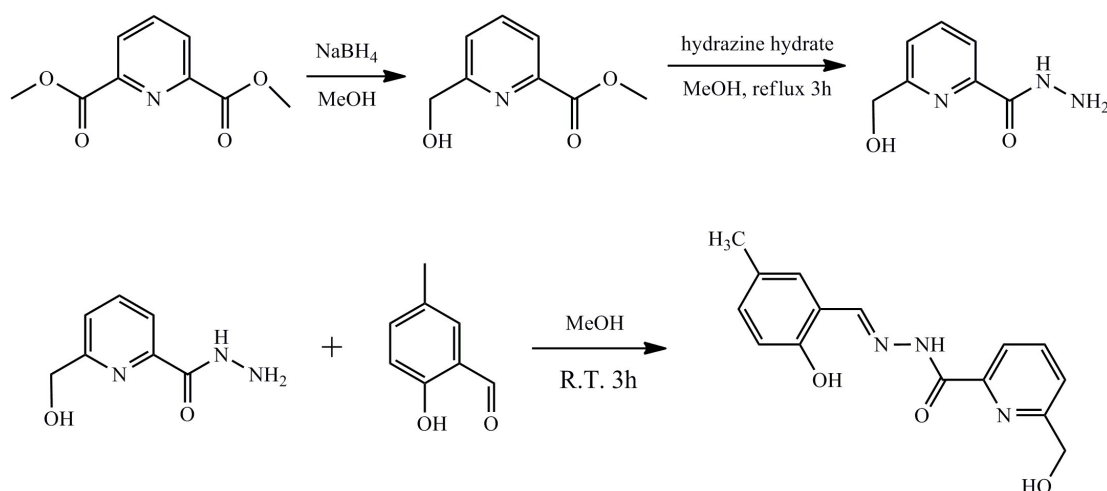

Scheme 1. The synthesis of H<sub>2</sub>L.

**Table S1** Selected bond lengths (Å) and angles (°) for complex **1<sup>a</sup>**

|                     |            |                       |            |
|---------------------|------------|-----------------------|------------|
| Gd(2)-O(24)#1       | 2.304(4)   | Gd(2)-O(7)            | 2.314(4)   |
| Gd(2)-O(3)          | 2.320(4)   | Gd(2)-O(2)            | 2.382(4)   |
| Gd(2)-O(5)          | 2.395(4)   | Gd(2)-O(4)            | 2.496(4)   |
| Gd(2)-N(3)          | 2.580(5)   | Gd(2)-N(4)            | 2.588(5)   |
| Gd(1)-O(7)          | 2.309(4)   | Gd(1)-O(24)           | 2.318(4)   |
| Gd(1)-O(6)#1        | 2.331(4)   | Gd(1)-O(5)#1          | 2.403(4)   |
| Gd(1)-O(2)          | 2.406(4)   | Gd(1)-O(1)            | 2.473(4)   |
| Gd(1)-N(6)#1        | 2.584(5)   | Gd(1)-N(1)            | 2.618(5)   |
| Gd(2)-Gd(1)         | 3.8723(4)  | Gd(2)-Gd(1)#1         | 3.8997(4)  |
|                     |            |                       |            |
| O(24)#1-Gd(2)-O(7)  | 101.25(14) | O(24)#1-Gd(2)-O(3)    | 92.49(14)  |
| O(7)-Gd(2)-O(3)     | 160.92(14) | O(24)#1-Gd(2)-O(2)    | 81.12(14)  |
| O(7)-Gd(2)-O(2)     | 67.17(14)  | O(3)-Gd(2)-O(2)       | 128.77(14) |
| O(24)#1-Gd(2)-O(5)  | 67.00(13)  | O(7)-Gd(2)-O(5)       | 89.67(14)  |
| O(3)-Gd(2)-O(5)     | 83.54(14)  | O(2)-Gd(2)-O(5)       | 136.14(13) |
| O(24)#1-Gd(2)-O(4)  | 169.30(14) | O(7)-Gd(2)-O(4)       | 80.41(14)  |
| O(3)-Gd(2)-O(4)     | 88.55(15)  | O(2)-Gd(2)-O(4)       | 89.93(14)  |
| O(5)-Gd(2)-O(4)     | 123.69(14) | O(24)#1-Gd(2)-N(3)    | 99.80(15)  |
| O(7)-Gd(2)-N(3)     | 120.10(14) | O(3)-Gd(2)-N(3)       | 69.59(15)  |
| O(2)-Gd(2)-N(3)     | 61.78(14)  | O(5)-Gd(2)-N(3)       | 149.83(15) |
| O(4)-Gd(2)-N(3)     | 70.60(15)  | O(24)#1-Gd(2)-N(4)    | 128.40(15) |
| O(7)-Gd(2)-N(4)     | 90.64(14)  | O(3)-Gd(2)-N(4)       | 70.38(14)  |
| O(2)-Gd(2)-N(4)     | 147.30(15) | O(5)-Gd(2)-N(4)       | 63.02(14)  |
| O(4)-Gd(2)-N(4)     | 61.85(14)  | N(3)-Gd(2)-N(4)       | 117.02(15) |
| O(24)#1-Gd(2)-Gd(1) | 83.31(9)   | O(24)#1-Gd(2)-Gd(1)#1 | 32.59(10)  |
| O(7)-Gd(1)-O(24)    | 101.40(14) | O(7)-Gd(1)-O(6)#1     | 92.92(14)  |
| O(24)-Gd(1)-O(6)#1  | 162.11(14) | O(7)-Gd(1)-O(5)#1     | 79.98(14)  |
| O(24)-Gd(1)-O(5)#1  | 66.64(13)  | O(6)#1-Gd(1)-O(5)#1   | 127.22(13) |
| O(7)-Gd(1)-O(2)     | 66.86(13)  | O(24)-Gd(1)-O(2)      | 91.04(13)  |
| O(6)#1-Gd(1)-O(2)   | 84.73(14)  | O(5)#1-Gd(1)-O(2)     | 135.51(13) |
| O(7)-Gd(1)-O(1)     | 171.47(13) | O(24)-Gd(1)-O(1)      | 79.41(14)  |
| O(6)#1-Gd(1)-O(1)   | 88.03(14)  | O(5)#1-Gd(1)-O(1)     | 92.69(13)  |
| O(2)-Gd(1)-O(1)     | 121.68(14) | O(7)-Gd(1)-N(6)#1     | 100.81(15) |
| O(24)-Gd(1)-N(6)#1  | 118.12(14) | O(6)#1-Gd(1)-N(6)#1   | 68.74(14)  |
| O(5)#1-Gd(1)-N(6)#1 | 61.69(14)  | O(2)-Gd(1)-N(6)#1     | 150.52(14) |
| O(1)-Gd(1)-N(6)#1   | 71.63(15)  | O(7)-Gd(1)-N(1)       | 127.22(14) |
| O(24)-Gd(1)-N(1)    | 91.95(14)  | O(6)#1-Gd(1)-N(1)     | 70.70(15)  |
| O(5)#1-Gd(1)-N(1)   | 149.55(14) | O(2)-Gd(1)-N(1)       | 62.02(14)  |
| O(1)-Gd(1)-N(1)     | 61.02(14)  | N(6)#1-Gd(1)-N(1)     | 117.16(15) |

<sup>a</sup>Symmetry transformations used to generate equivalent atoms: #1 -x+1,y,-z+3/2

**Table S2** Selected bond lengths (Å) and angles (°) for complex **2<sup>a</sup>**

|                     |            |                      |            |
|---------------------|------------|----------------------|------------|
| Tb(2)-O(7)          | 2.294(5)   | Tb(2)-O(8)#1         | 2.301(4)   |
| Tb(2)-O(1)#1        | 2.314(5)   | Tb(2)-O(2)#1         | 2.381(5)   |
| Tb(2)-O(5)          | 2.382(5)   | Tb(2)-O(6)           | 2.483(5)   |
| Tb(2)-N(6)          | 2.574(6)   | Tb(2)-N(1)#1         | 2.577(6)   |
| Tb(1)-O(8)          | 2.289(5)   | Tb(1)-O(7)           | 2.308(5)   |
| Tb(1)-O(4)          | 2.321(5)   | Tb(1)-O(2)           | 2.382(5)   |
| Tb(1)-O(5)          | 2.387(5)   | Tb(1)-O(3)           | 2.460(5)   |
| Tb(1)-N(4)          | 2.583(6)   | Tb(1)-N(3)           | 2.609(6)   |
| Tb(2)-Tb(1)#1       | 3.8498(5)  | Tb(2)-Tb(1)          | 3.8792(6)  |
| O(7)-Tb(2)-O(8)#1   | 101.34(17) | O(7)-Tb(2)-O(1)#1    | 92.04(17)  |
| O(8)#1-Tb(2)-O(1)#1 | 160.99(18) | O(7)-Tb(2)-O(2)#1    | 81.04(17)  |
| O(8)#1-Tb(2)-O(2)#1 | 66.85(17)  | O(1)#1-Tb(2)-O(2)#1  | 129.33(17) |
| O(7)-Tb(2)-O(5)     | 66.90(17)  | O(8)#1-Tb(2)-O(5)    | 89.96(17)  |
| O(1)#1-Tb(2)-O(5)   | 82.88(17)  | O(2)#1-Tb(2)-O(5)    | 135.94(16) |
| O(7)-Tb(2)-O(6)     | 168.67(17) | O(8)#1-Tb(2)-O(6)    | 80.66(17)  |
| O(1)#1-Tb(2)-O(6)   | 88.87(18)  | O(2)#1-Tb(2)-O(6)    | 89.64(17)  |
| O(5)-Tb(2)-O(6)     | 124.40(17) | O(7)-Tb(2)-N(6)      | 128.76(18) |
| O(8)#1-Tb(2)-N(6)   | 90.64(17)  | O(1)#1-Tb(2)-N(6)    | 70.40(18)  |
| O(2)#1-Tb(2)-N(6)   | 146.98(18) | O(5)-Tb(2)-N(6)      | 63.46(18)  |
| O(6)-Tb(2)-N(6)     | 62.02(18)  | O(7)-Tb(2)-N(1)#1    | 99.31(19)  |
| O(8)#1-Tb(2)-N(1)#1 | 120.30(18) | O(1)#1-Tb(2)-N(1)#1  | 69.85(18)  |
| O(2)#1-Tb(2)-N(1)#1 | 62.09(17)  | O(5)-Tb(2)-N(1)#1    | 149.26(18) |
| O(6)-Tb(2)-N(1)#1   | 70.43(19)  | N(6)-Tb(2)-N(1)#1    | 117.02(19) |
| O(7)-Tb(2)-Tb(1)#1  | 83.36(11)  | O(8)#1-Tb(2)-Tb(1)#1 | 32.91(12)  |
| O(8)-Tb(1)-O(7)     | 101.66(17) | O(8)-Tb(1)-O(4)      | 92.71(17)  |
| O(7)-Tb(1)-O(4)     | 161.71(17) | O(8)-Tb(1)-O(2)      | 67.02(17)  |
| O(7)-Tb(1)-O(2)     | 91.28(17)  | O(4)-Tb(1)-O(2)      | 83.90(17)  |
| O(8)-Tb(1)-O(5)     | 80.14(17)  | O(7)-Tb(1)-O(5)      | 66.60(17)  |
| O(4)-Tb(1)-O(5)     | 127.84(17) | O(2)-Tb(1)-O(5)      | 135.83(16) |
| O(8)-Tb(1)-O(3)     | 170.92(17) | O(7)-Tb(1)-O(3)      | 79.53(17)  |
| O(4)-Tb(1)-O(3)     | 88.07(17)  | O(2)-Tb(1)-O(3)      | 122.04(17) |
| O(5)-Tb(1)-O(3)     | 92.24(17)  | O(8)-Tb(1)-N(4)      | 100.30(18) |
| O(7)-Tb(1)-N(4)     | 118.28(18) | O(4)-Tb(1)-N(4)      | 69.29(18)  |
| O(2)-Tb(1)-N(4)     | 150.11(19) | O(5)-Tb(1)-N(4)      | 61.61(18)  |
| O(3)-Tb(1)-N(4)     | 71.53(18)  | O(8)-Tb(1)-N(3)      | 127.40(17) |
| O(7)-Tb(1)-N(3)     | 91.91(18)  | O(4)-Tb(1)-N(3)      | 70.23(18)  |
| O(2)-Tb(1)-N(3)     | 62.04(17)  | O(5)-Tb(1)-N(3)      | 149.32(18) |
| O(3)-Tb(1)-N(3)     | 61.27(17)  | N(4)-Tb(1)-N(3)      | 117.27(18) |

<sup>a</sup>Symmetry transformations used to generate equivalent atoms: #1 -x+1,y,-z+1/2

**Table S3** Selected bond lengths (Å) and angles (°) for complex **3<sup>a</sup>**

|                     |            |                     |            |
|---------------------|------------|---------------------|------------|
| Dy(2)-O(2)#1        | 2.376(3)   | Dy(2)-O(5)          | 2.375(3)   |
| Dy(2)-O(7)#1        | 2.285(3)   | Dy(2)-O(8)          | 2.282(3)   |
| Dy(2)-O(6)          | 2.307(3)   | Dy(2)-O(1)#1        | 2.456(3)   |
| Dy(2)-N(6)          | 2.573(4)   | Dy(2)-N(1)#1        | 2.596(4)   |
| Dy(1)-O(2)          | 2.361(3)   | Dy(1)-O(5)          | 2.376(3)   |
| Dy(1)-O(7)          | 2.284(3)   | Dy(1)-O(8)          | 2.292(3)   |
| Dy(1)-O(3)          | 2.291(3)   | Dy(1)-O(4)          | 2.475(3)   |
| Dy(1)-N(3)          | 2.566(4)   | Dy(1)-N(4)          | 2.573(4)   |
| Dy(2)-Dy(1)         | 3.8670(4)  | Dy(2)-Dy(1)#1       | 3.8375(3)  |
| O(2)#1-Dy(2)-O(1)#1 | 122.60(11) | O(2)#1-Dy(2)-N(6)   | 150.05(13) |
| O(2)#1-Dy(2)-N(1)#1 | 62.43(11)  | O(5)-Dy(2)-O(2)#1   | 134.81(11) |
| O(5)-Dy(2)-O(1)#1   | 92.74(12)  | O(5)-Dy(2)-N(6)     | 61.82(12)  |
| O(5)-Dy(2)-N(1)#1   | 149.78(12) | O(7)#1-Dy(2)-O(2)#1 | 66.58(11)  |
| O(7)#1-Dy(2)-O(5)   | 79.70(12)  | O(7)#1-Dy(2)-O(6)   | 92.44(12)  |
| O(7)#1-Dy(2)-O(1)#1 | 170.79(11) | O(7)#1-Dy(2)-N(6)   | 99.88(12)  |
| O(7)#1-Dy(2)-N(1)#1 | 127.26(12) | O(8)-Dy(2)-O(2)#1   | 90.96(11)  |
| O(8)-Dy(2)-O(5)     | 66.64(11)  | O(8)-Dy(2)-O(7)#1   | 101.69(12) |
| O(8)-Dy(2)-O(6)     | 161.93(12) | O(8)-Dy(2)-O(1)#1   | 79.81(12)  |
| O(8)-Dy(2)-N(6)     | 118.51(12) | O(8)-Dy(2)-N(1)#1   | 91.90(12)  |
| O(6)-Dy(2)-O(2)#1   | 84.33(12)  | O(6)-Dy(2)-O(5)     | 127.80(12) |
| O(6)-Dy(2)-O(1)#1   | 88.04(12)  | O(6)-Dy(2)-N(6)     | 69.15(13)  |
| O(6)-Dy(2)-N(1)#1   | 70.45(13)  | O(1)#1-Dy(2)-N(6)   | 71.70(12)  |
| O(1)#1-Dy(2)-N(1)#1 | 61.45(12)  | N(6)-Dy(2)-N(1)#1   | 117.65(12) |
| O(2)-Dy(1)-O(5)     | 135.18(11) | O(2)-Dy(1)-O(4)     | 89.95(12)  |
| O(2)-Dy(1)-N(3)     | 62.37(12)  | O(2)-Dy(1)-N(4)     | 147.27(12) |
| O(5)-Dy(1)-O(4)     | 124.81(11) | O(5)-Dy(1)-N(3)     | 149.26(12) |
| O(5)-Dy(1)-N(4)     | 63.69(12)  | O(7)-Dy(1)-O(2)     | 66.85(11)  |
| O(7)-Dy(1)-O(5)     | 89.55(12)  | O(7)-Dy(1)-O(8)     | 101.37(11) |
| O(7)-Dy(1)-O(3)     | 160.83(12) | O(7)-Dy(1)-O(4)     | 81.00(12)  |
| O(7)-Dy(1)-N(3)     | 120.61(12) | O(7)-Dy(1)-N(4)     | 90.62(12)  |
| O(8)-Dy(1)-O(2)     | 80.95(12)  | O(8)-Dy(1)-O(5)     | 66.48(11)  |
| O(8)-Dy(1)-O(4)     | 168.65(11) | O(8)-Dy(1)-N(3)     | 99.13(13)  |
| O(8)-Dy(1)-N(4)     | 128.48(12) | O(3)-Dy(1)-O(2)     | 129.51(11) |
| O(3)-Dy(1)-O(5)     | 83.33(12)  | O(3)-Dy(1)-O(8)     | 92.09(12)  |
| O(3)-Dy(1)-O(4)     | 88.48(12)  | O(3)-Dy(1)-N(3)     | 69.71(12)  |
| O(3)-Dy(1)-N(4)     | 70.26(12)  | O(4)-Dy(1)-N(3)     | 70.46(13)  |
| O(4)-Dy(1)-N(4)     | 62.20(12)  | N(3)-Dy(1)-N(4)     | 117.24(13) |
| Dy(1)-O(2)-Dy(2)#1  | 108.21(12) | Dy(2)-O(5)-Dy(1)    | 108.95(12) |
| Dy(1)-O(7)-Dy(2)#1  | 114.24(13) | Dy(2)-O(8)-Dy(1)    | 115.47(14) |

<sup>a</sup>Symmetry transformations used to generate equivalent atoms: #1 -x+1,y,-z+1/2

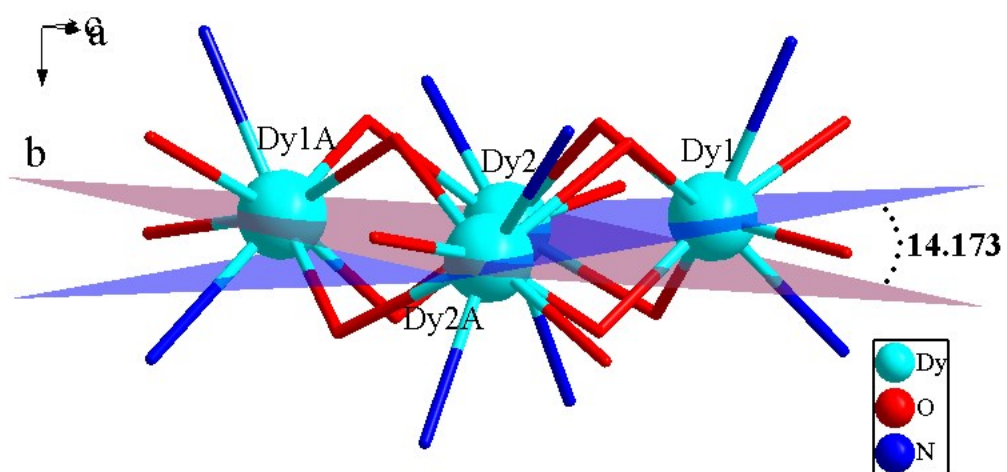

Figure S1 The dihedral angle between the two planes (two Dy2–Dy2–Dy1) of **3** (all hydrogen atoms are omitted for clarity).

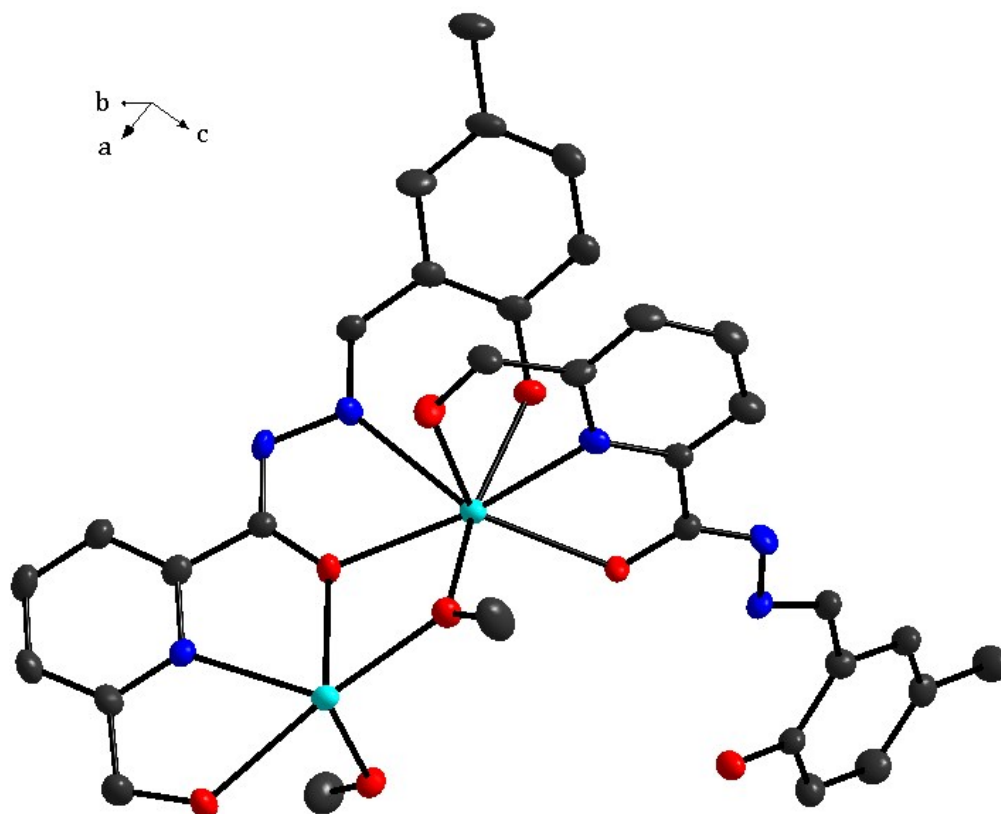

Figure S2 Coordination environments of  $\text{Gd}^{3+}$  compound **1**. All hydrogen atoms and solvent molecules are omitted for clarity. Thermal ellipsoids are at 50% probability.

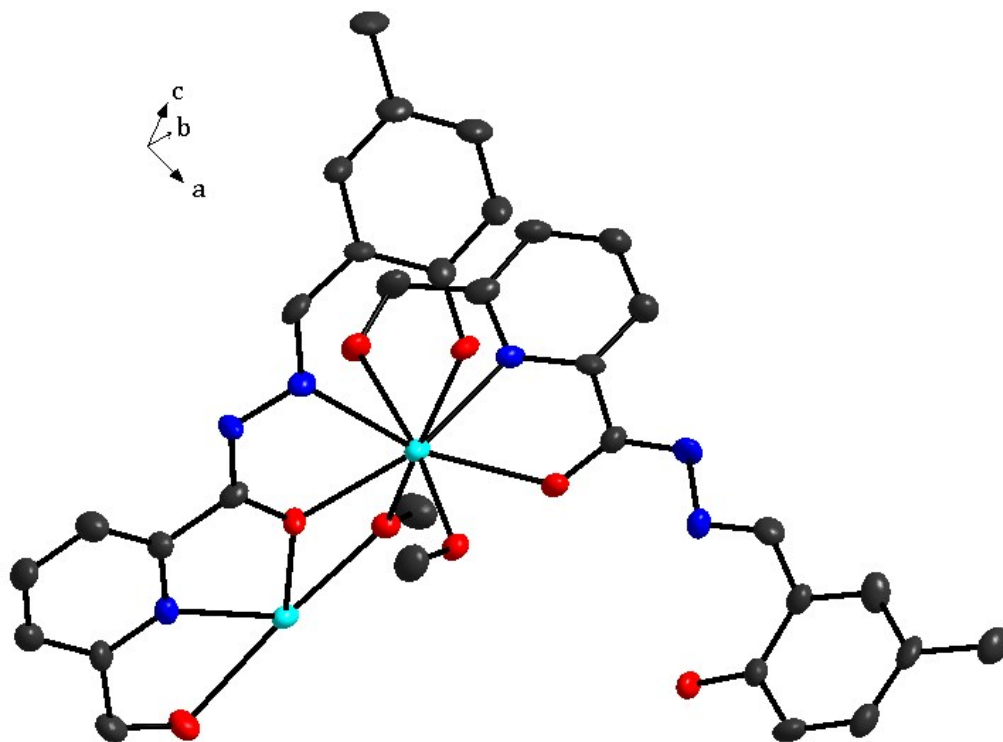

Figure S2 Coordination environments of Tb<sup>3+</sup> compound 2. All hydrogen atoms and solvent molecules are omitted for clarity. Thermal ellipsoids are at 50% probability.

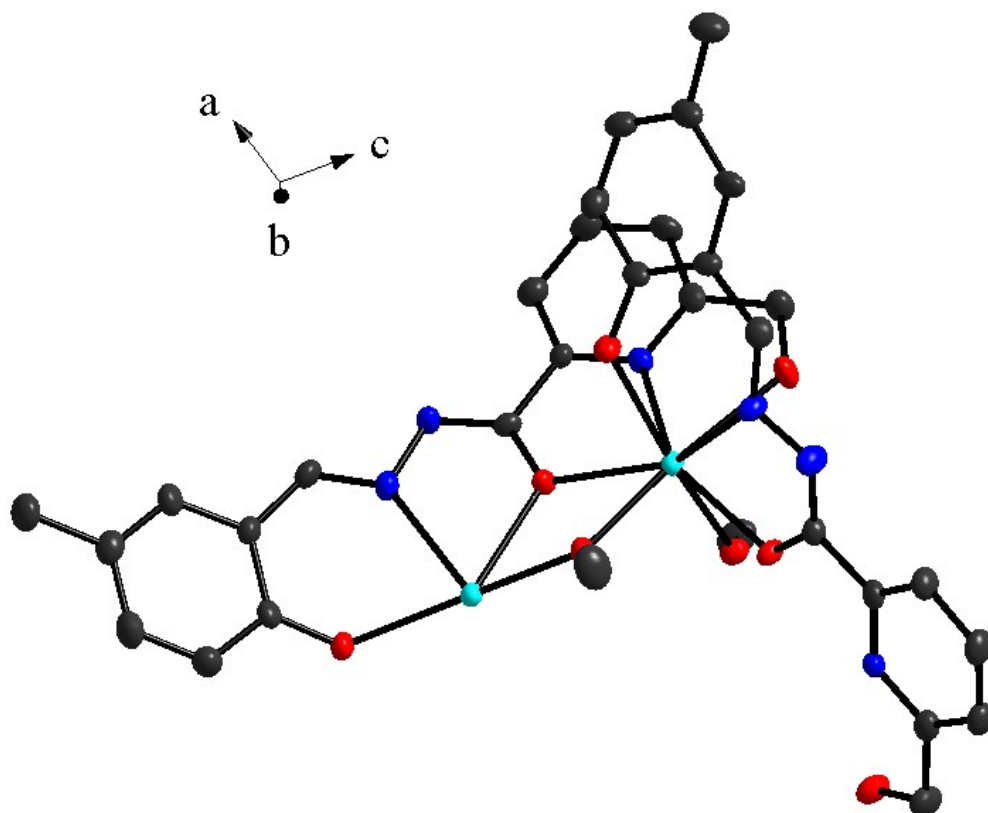

Figure S4 Coordination environments of Dy<sup>3+</sup> compound 3. All hydrogen atoms and solvent molecules are omitted for clarity. Thermal ellipsoids are at 50% probability.
